# Supplementary material for: Swedish translation and linguistic validation of the multidimensional dyspnoea profile
Source: PubMed Central journal article supplement (PMC5103669; doi:10.3402/ecrj.v3.32665), 2016-11-08
Supplement: ECRJ-3-32665-s001.pdf [file ECRJ-3-32665-s001.pdf]

SQ (Sensorisk kvalitet) val

Nedan följer meningar eller beskrivningar som delats in i meningar med liknande betydelse.

**Steg 1:** Sätt ett kryss för varje mening som innehåller ord som beskriver hur din andning känns [kändes] under \_\_\_\_\_ (ange fokusperioden).

**Steg 2:** Sätt ett kryss även för *den* mening som bäst beskriver hur din andning känns [kändes].

| Om <i>NÅGON</i> av beskrivningarna i meningen stämmer in på dig, välj den meningen.          | Steg 1          |         | Steg 2         |
|----------------------------------------------------------------------------------------------|-----------------|---------|----------------|
|                                                                                              | STÄMMER<br>INTE | STÄMMER | BESKRIVER BÄST |
| Min andning kräver muskelarbete <i>eller</i> ansträngning.                                   |                 |         |                |
| Jag får inte tillräckligt med luft <i>eller</i> jag kvävs <i>eller</i> jag vill ha mer luft. |                 |         |                |
| Min bröstorg och mina lungor känns trånga <i>eller</i> sammantryckta.                        |                 |         |                |
| Min andning kräver mental ansträngning <i>eller</i> koncentration.                           |                 |         |                |
| Jag andas mycket.                                                                            |                 |         |                |

### SQ (Sensorisk kvalitet) skalor

Använd följande skalor för att gradera intensiteten på de andningsupplevelser som du har [hade]. Jämför med volymen på ett ljud som oavsett om det är behagligt eller ett obehagligt kan vara en stark upplevelse utan att vara obehagligt.

Fokusera på perioden när \_\_\_\_\_

| Om NÅGOT av orden i meningen stämmer in på dig ska du gradera meningen.                      | INTE ALLS |   |   |   |   |   |   |   |   |   | DEN STÖRSTA INTENSITET SOM JAG KAN FÖRESTÄLLA MIG |
|----------------------------------------------------------------------------------------------|-----------|---|---|---|---|---|---|---|---|---|---------------------------------------------------|
| Min andning kräver muskelarbete <i>eller</i> ansträngning.                                   | 0         | 1 | 2 | 3 | 4 | 5 | 6 | 7 | 8 | 9 | 10                                                |
| Jag får inte tillräckligt med luft <i>eller</i> jag kvävs <i>eller</i> jag vill ha mer luft. | 0         | 1 | 2 | 3 | 4 | 5 | 6 | 7 | 8 | 9 | 10                                                |
| Min bröstkorg och mina lungor känns trånga <i>eller</i> sammantryckta.                       | 0         | 1 | 2 | 3 | 4 | 5 | 6 | 7 | 8 | 9 | 10                                                |
| Min andning kräver mental ansträngning <i>eller</i> koncentration.                           | 0         | 1 | 2 | 3 | 4 | 5 | 6 | 7 | 8 | 9 | 10                                                |
| Jag andas mycket.                                                                            | 0         | 1 | 2 | 3 | 4 | 5 | 6 | 7 | 8 | 9 | 10                                                |
| Annat*                                                                                       | 0         | 1 | 2 | 3 | 4 | 5 | 6 | 7 | 8 | 9 | 10                                                |

\*Om det behövs kan du lägga till ytterligare beskrivningar av dina andningsupplevelser.

## A2-skalar

När din andning inte känns som den brukar kan det hända att du upplever vissa "känslor". Använd skalorna nedan till att förklara hur dina andningsupplevelser har fått dig att känna dig – sätt noll på de känslor du inte har känt.

Fokusera på dina känslor under perioden när \_\_\_\_\_

|            | INTE ALLS |   |   |   |   |   |   |   |   |   | MESTA<br>TÄNKBARA |
|------------|-----------|---|---|---|---|---|---|---|---|---|-------------------|
| Deprimerad | 0         | 1 | 2 | 3 | 4 | 5 | 6 | 7 | 8 | 9 | 10                |
| Ängslig    | 0         | 1 | 2 | 3 | 4 | 5 | 6 | 7 | 8 | 9 | 10                |
| Frustrerad | 0         | 1 | 2 | 3 | 4 | 5 | 6 | 7 | 8 | 9 | 10                |
| Arg        | 0         | 1 | 2 | 3 | 4 | 5 | 6 | 7 | 8 | 9 | 10                |
| Rädd       | 0         | 1 | 2 | 3 | 4 | 5 | 6 | 7 | 8 | 9 | 10                |
| Annat?     | 0         | 1 | 2 | 3 | 4 | 5 | 6 | 7 | 8 | 9 | 10                |
